# Supplementary material for: Mechanism of Cadmium Exposure Induced Hepatotoxicity in the Mud Crab (Scylla paramamosain): Activation of Oxidative Stress and Nrf2 Signaling Pathway
Source: MDPI journal article supplement (doi:10.3390/antiox11050978), 2022-05-17
Supplement: s1 [file s1]

**Table S1** Primer sequences of all genes used in this study.

| Primers name      | Nucleotide sequence (5'-3')                       |
|-------------------|---------------------------------------------------|
| RT-18S-F          | TTTTCTGAACCCGAGGTAATGAC                           |
| RT-18S-R          | ATGCTTTCGCAGTAGTTCGTCTT                           |
| RT-Nrf2-F         | AGTGTCAGGGTCTTCTGTGGAGC                           |
| RT-Nrf2-R         | CATAGGCAGGTTGATGATGTCGT                           |
| RT-CYP2-F         | TGGTGGCAAGCAGACAGTTCG                             |
| RT-CYP2-R         | GCCTTGTGCTTCTCGGTCTCAT                            |
| RT-MT-F           | CAAATGTGCCAACAAGGAGGA                             |
| RT-MT-R           | TGTGACGGTGGGGAATGATG                              |
| dsNrf2-F(with T7) | TAATACGACTCACTATAGGGCCGTTGGA<br>CAGATACAGGT       |
| Nrf2-R            | CCTCATCAGCCAGGTGTGTA                              |
| dsNrf2-R(with T7) | TAATACGACTCACTATAGGCCTCATCAG<br>CCAGGTGTGTA       |
| Nrf2-F            | GCCGTTGGACAGATACAGGT                              |
| dsGFP-F(with T7)  | TAATACGACTCACTATAGGATGGTGAGC<br>AAGGGCGAGGAG      |
| dsGFP-R           | ATGGTGAGCAAGGGCGAGGAG                             |
| dsGFP-R(with T7)  | TAATACGACTCACTATAGGTCAAAGATC<br>TACCATGTACAGCTCGT |
| dsGFP-R           | TCAAAGATCTACCATGTACAGCTCGT                        |

**Figure S1.** IBRv2 values following biomarkers (SOD, CAT, MDA, T-AOC and H<sub>2</sub>O<sub>2</sub>) in a gradient of cadmium exposure affection. (A) 0.01 mg/L cadmium treatment group; (B) 0.05 mg/L cadmium treatment group; (C) 0.125 mg/L cadmium treatment group. IBRv2 values were compared to the control group.

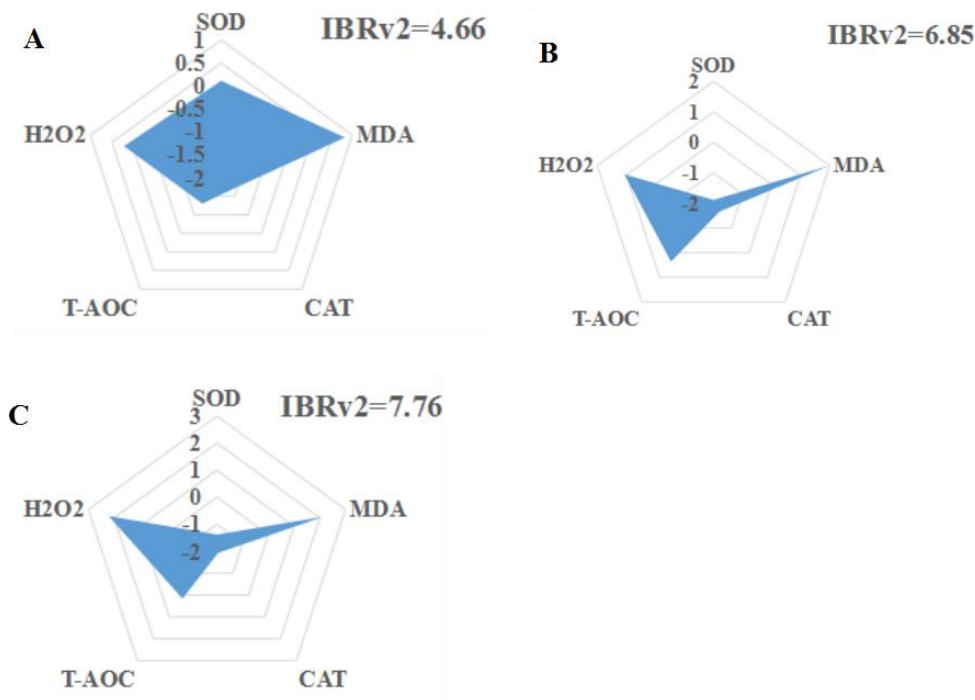

## Abbreviations

**SOD:** Superoxide Dismutase; **H<sub>2</sub>O<sub>2</sub>:**Hydrogen Peroxide; **CAT:** Catalase; **MDA:**Malondialdehyde; **GST:**Glutathione S-transferase; **ROS:**Reactive Oxygen Species; **CYPs:**Cytochrome P450 enzymes; **MT:**Metallothionein; **T-AOC:**Total Antioxidant Capacity; **qRT-PCR:**Quantitative real time PCR; **GFP:**Green Fluorescent Protein; **IBRv2:** Integrated biological responses version 2.
